# Supplementary material for: Establishment and Application of a Novel Genetic Detection Panel for SNPs in Mongolian Gerbils
Source: MDPI journal article supplement (doi:10.3390/genes15060817), 2024-06-20
Supplement: s1 [file s1]

## Sheet: Sheet1
	Number	CHROM	POS	REF		Number	CHROM	POS	REF
1	MG1	NW_018657741.1	98533	G	104	MG108	NW_018658152.1	182112	T
2	MG2	NW_018657745.1	38708	C	105	MG109	NW_018658160.1	706513	C
3	MG3	NW_018657747.1	311094	C	106	MG110	NW_018658161.1	564857	A
4	MG4	NW_018657753.1	678345	T	107	MG111	NW_018658162.1	824332	G
5	MG5	NW_018657754.1	560493	G	108	MG112	NW_018658163.1	768562	C
6	MG6	NW_018657756.1	1631916	G	109	MG113	NW_018658164.1	274510	C
7	MG7	NW_018657763.1	436051	G	110	MG114	NW_018658168.1	333441	C
8	MG8	NW_018657766.1	14630	G	111	MG115	NW_018658170.1	468694	A
9	MG9	NW_018657770.1	1991006	T	112	MG116	NW_018658171.1	131760	A
10	MG10	NW_018657771.1	648802	T	113	MG117	NW_018658172.1	79754	G
11	MG11	NW_018657775.1	769235	G	114	MG118	NW_018658174.1	212207	G
12	MG12	NW_018657781.1	449005	C	115	MG119	NW_018658176.1	75780	A
13	MG14	NW_018657787.1	1710775	G	116	MG120	NW_018658178.1	144377	C
14	MG15	NW_018657791.1	460062	A	117	MG121	NW_018658179.1	526230	C
15	MG16	NW_018657795.1	55707	T	118	MG122	NW_018658182.1	70420	T
16	MG17	NW_018657799.1	1516582	C	119	MG123	NW_018658186.1	356057	A
17	MG18	NW_018657807.1	131051	G	120	MG124	NW_018658203.1	697270	C
18	MG19	NW_018657809.1	563494	T	121	MG125	NW_018658204.1	819451	G
19	MG20	NW_018657811.1	447910	A	122	MG126	NW_018658204.1	827892	T
20	MG21	NW_018657817.1	398040	G	123	MG127	NW_018658244.1	165971	C
21	MG22	NW_018657824.1	1734814	A	124	MG128	NW_018658258.1	331982	G
22	MG23	NW_018657825.1	519839	C	125	MG129	NW_018658270.1	64962	G
23	MG24	NW_018657826.1	1292302	C	126	MG130	NW_018658272.1	786805	G
24	MG25	NW_018657829.1	1055767	T	127	MG132	NW_018658278.1	540596	C
25	MG26	NW_018657831.1	719604	A	128	MG133	NW_018658342.1	247024	T
26	MG27	NW_018657831.1	879559	A	129	MG134	NW_018658431.1	259878	G
27	MG28	NW_018657833.1	248286	G	130	MG135	NW_018658433.1	394995	G
28	MG29	NW_018657834.1	189478	T	131	MG136	NW_018658498.1	329607	G
29	MG30	NW_018657836.1	459295	T	132	MG137	NW_018658583.1	438639	G
30	MG31	NW_018657838.1	1246167	G	133	MG138	NW_018658610.1	530516	T
31	MG32	NW_018657841.1	1168344	G	134	MG139	NW_018658612.1	137997	G
32	MG33	NW_018657844.1	118590	C	135	MG140	NW_018658631.1	60885	T
33	MG35	NW_018657849.1	147294	G	136	MG141	NW_018658696.1	413432	A
34	MG36	NW_018657857.1	308189	C	137	MG142	NW_018658707.1	206847	C
35	MG37	NW_018657859.1	1081095	C	138	MG143	NW_018658719.1	489075	G
36	MG38	NW_018657865.1	33504	C	139	MG144	NW_018658731.1	91923	G
37	MG39	NW_018657867.1	186713	G	140	MG145	NW_018658735.1	102331	T
38	MG40	NW_018657868.1	924443	A	141	MG147	NW_018658767.1	212478	C
39	MG41	NW_018657873.1	625203	A	142	MG148	NW_018658782.1	494384	T
40	MG42	NW_018657875.1	414824	G	143	MG149	NW_018658832.1	303382	C
41	MG43	NW_018657879.1	403965	T	144	MG150	NW_018658891.1	293353	G
42	MG44	NW_018657883.1	665202	C	145	MG151	NW_018658931.1	191519	C
43	MG45	NW_018657884.1	437796	C	146	MG152	NW_018659004.1	397869	C
44	MG46	NW_018657888.1	735326	A	147	MG153	NW_018659011.1	268519	G
45	MG47	NW_018657888.1	1469235	A	148	MG154	NW_018659015.1	154339	C
46	MG48	NW_018657891.1	586865	T	149	MG155	NW_018659017.1	199697	A
47	MG49	NW_018657893.1	1416535	C	150	MG156	NW_018659021.1	1965	A
48	MG50	NW_018657897.1	463201	C	151	MG157	NW_018659022.1	188118	A
49	MG51	NW_018657903.1	88938	G	152	MG158	NW_018659023.1	43208	A
50	MG52	NW_018657905.1	595719	G	153	MG159	NW_018659023.1	51846	C
51	MG53	NW_018657911.1	263254	C	154	MG161	NW_018659102.1	20454	G
52	MG54	NW_018657915.1	154939	T	155	MG162	NW_018659167.1	382149	G
53	MG55	NW_018657923.1	989207	G	156	MG163	NW_018659169.1	238430	C
54	MG56	NW_018657925.1	201393	A	157	MG164	NW_018659319.1	233618	A
55	MG57	NW_018657931.1	626614	G	158	MG165	NW_018659371.1	229459	C
56	MG58	NW_018657933.1	1081880	T	159	MG167	NW_018659372.1	316977	C
57	MG59	NW_018657940.1	1086178	C	160	MG168	NW_018659461.1	81982	C
58	MG60	NW_018657940.1	1304219	C	161	MG169	NW_018659568.1	45252	A
59	MG61	NW_018657947.1	160127	A	162	MG170	NW_018659622.1	233731	C
60	MG62	NW_018657951.1	640428	A	163	MG171	NW_018659632.1	74823	A
61	MG63	NW_018657958.1	234817	C	164	MG172	NW_018659636.1	278293	C
62	MG64	NW_018657961.1	673	T	165	MG173	NW_018659642.1	195248	C
63	MG65	NW_018657963.1	606891	G	166	MG174	NW_018659643.1	190818	G
64	MG66	NW_018657969.1	202995	G	167	MG176	NW_018659695.1	274778	C
65	MG67	NW_018657976.1	1219163	T	168	MG177	NW_018659804.1	27897	C
66	MG68	NW_018657978.1	450420	T	169	MG178	NW_018659807.1	248844	T
67	MG69	NW_018657979.1	84392	G	170	MG179	NW_018659867.1	38430	T
68	MG70	NW_018657983.1	363016	A	171	MG180	NW_018659867.1	260768	G
69	MG71	NW_018657991.1	462104	T	172	MG182	NW_018659909.1	240606	G
70	MG73	NW_018658000.1	110223	T	173	MG183	NW_018659924.1	91182	T
71	MG74	NW_018658009.1	639141	A	174	MG184	NW_018660035.1	57823	C
72	MG75	NW_018658013.1	386598	T	175	MG185	NW_018660342.1	95180	A
73	MG76	NW_018658015.1	308883	C	176	MG186	NW_018660876.1	128939	T
74	MG77	NW_018658023.1	1119570	C	177	MG187	NW_018660915.1	173980	G
75	MG78	NW_018658030.1	484689	G	178	MG188	NW_018661184.1	2149	T
76	MG79	NW_018658033.1	25028	G	179	MG189	NW_018661523.1	42643	C
77	MG80	NW_018658033.1	604720	A	180	MG190	NW_018661696.1	2303	A
78	MG81	NW_018658040.1	312346	C	181	MG191	NW_018661981.1	35887	T
79	MG82	NW_018658044.1	1083386	G	182	MG192	NW_018662155.1	5661	G
80	MG83	NW_018658045.1	152946	G	183	MG193	NW_018662271.1	72320	A
81	MG84	NW_018658047.1	122514	G	184	MG194	NW_018662433.1	63919	G
82	MG85	NW_018658050.1	713186	A	185	MG195	NW_018662723.1	76688	A
83	MG86	NW_018658057.1	33078	G	186	MG196	NW_018662733.1	35633	C
84	MG87	NW_018658060.1	167818	A	187	MG197	NW_018662747.1	9886	A
85	MG88	NW_018658067.1	612340	C	188	MG198	NW_018662761.1	36236	T
86	MG89	NW_018658069.1	554993	C	189	MG200	NW_018663476.1	24518	C
87	MG90	NW_018658072.1	555663	C	190	MG201	NW_018663541.1	79262	A
88	MG91	NW_018658078.1	48587	T	191	MG202	NW_018663568.1	46493	A
89	MG92	NW_018658081.1	346678	G	192	MG203	NW_018663777.1	77165	C
90	MG93	NW_018658083.1	76803	C	193	MG204	NW_018663780.1	21314	C
91	MG94	NW_018658087.1	982880	T	194	MG205	NW_018663780.1	38006	G
92	MG95	NW_018658089.1	544294	G	195	MG206	NW_018664076.1	72288	G
93	MG97	NW_018658102.1	117150	G	196	MG208	NW_018673612.1	2813	G
94	MG98	NW_018658105.1	206171	A	197	MG209	NW_018674377.1	2999	C
95	MG99	NW_018658113.1	64901	C	198	MG210	NW_018674966.1	5179	C
96	MG100	NW_018658118.1	308983	G	199	MG211	NW_018675192.1	5452	A
97	MG101	NW_018658119.1	161620	C	200	MG212	NW_018675379.1	4875	A
98	MG102	NW_018658128.1	673395	A	201	MG213	NW_018675418.1	7016	G
99	MG103	NW_018658132.1	145696	C	202	MG214	NW_018675702.1	1456	T
100	MG104	NW_018658147.1	41696	T	203	MG215	NW_018676455.1	6626	T
101	MG105	NW_018658148.1	43992	C	204	MG216	NW_018676856.1	2431	G
102	MG106	NW_018658149.1	310094	C	205	MG217	NW_018680011.1	3181	G
103	MG107	NW_018658151.1	621718	G	206	MG219	NW_018692212.1	1211	G
	注
	黄色表示MG15在大连沙鼠和浙江沙鼠中呈现多态性，基因分型有AG/GG/AA三种，在首医沙鼠中呈现单态性，只有GG一种分型
	橙色表示14个可以区分脑缺血沙鼠和糖尿病沙鼠的单态位点
	D1
	D2
	D3
	D4
	D5
	D6
	D7
	D8
	D9
	D10
	D11
	D12
	D13
	D14
	D15
	D16
	D17
	D18
	D19
	D20
	D21
	D22
	D23
	D24
	D25
	D26
	D27
	D28
	D29
	D30
	D31
	D32
	N1
	N2
	N3
	N4
	N5
	N6
	N7
	N8
	N9
	N10
	T1
	T2
	T3
	T4
	T5
	T6
	T7
	T8
	T9
	T10
	Z1
	Z2
	Z3
	Z4
	Z5
	Z6
	Z7
	Z8
	Z9-1
	Z10-1
	Z11
	Z12
	Z13
	Z14
	Z15
	Z16
	Z17
	Z18
	Z19
	Z20
	Z21
	Z22
	Z23
	Z24
	Z25
	Z26
	Z27
	Z28
	Z29
	Z30
	Z31
	Z32
	Z33
	Z34
	Z35
	Z36
	Z37
	W1
	W2
	W3
	W4
	W5
	W6
	W7
	W8
	W9
	W10
	W11
	W12
	W13
	W14
	W15
	W16
	W17
	W18
	W19
	W20
	W21
	W22
	W23
	W24
	W25
	W26
	W27
	W28
	W29
	W30
	W31
